# Supplementary material for: Photocatalytic activity enhancement with 4-trifluoromethylphenylacetylene-functionalized Cu2O cubes and rhombic dodecahedra from band structure modulation and use in boronic acid hydroxylation
Source: Royal Society of Chemistry journal article supplement (doi:10.1039/d3ta07978c), 2024-01-01
Supplement: d3ta07978c1.pdf [file d3ta07978c1.pdf]

## Electronic Supplementary Information

### **Photocatalytic activity enhancement with 4-trifluoromethylphenylacetylene-functionalized Cu<sub>2</sub>O cubes and rhombic dodecahedra from band structure modulation and use in boronic acid hydroxylation**

Kuo-Chang Chien,<sup>a</sup> Wei-Yang Yu,<sup>b</sup> Jui-Cheng Kao,<sup>b</sup> Yu-Chieh Lo,<sup>\*b</sup> Jyh-Pin Chou<sup>\*c</sup> and Michael H. Huang<sup>\*a</sup>

<sup>a</sup>*Department of Chemistry, National Tsing Hua University, Hsinchu 30013, Taiwan.*

*E-mail: hyhuang@mx.nthu.edu.tw*

<sup>b</sup>*Department of Materials Science and Engineering, National Yang Ming Chiao Tung University, Hsinchu 30010, Taiwan.*

<sup>c</sup>*Department of Physics, National Changhua University of Education, Changhua 50007, Taiwan. E-mail: jpchou@cc.ncue.edu.tw*

### **Chemicals**

Copper(II) chloride anhydrous (CuCl<sub>2</sub>, 98%, Alfa Aesar), hydroxylamine hydrochloride (NH<sub>2</sub>OH·HCl, 99%, Sigma-Aldrich), sodium hydroxide (98%, Showa), sodium dodecyl sulfate (≥99%, J.T. Baker), potassium carbonate (99%, Alfa Aesar), absolute ethanol (≥99.5%, Honeywell), methyl orange (C<sub>14</sub>H<sub>14</sub>N<sub>3</sub>NaO<sub>3</sub>S, Alfa Aesar), 4-trifluoromethylphenylacetylene (4-TFMA, 95%, Combi-Blocks), potassium bromate (KBrO<sub>3</sub>, 99%, Alfa Aesar), sodium oxalate (Na<sub>2</sub>C<sub>2</sub>O<sub>4</sub>, ≥99.0%, Sigma-Aldrich), DMPO (5,5-dimethyl-1-pyrroline-N-oxide, 98%, Matrix Scientific), *N,N*-diisopropylethylamine (C<sub>8</sub>H<sub>19</sub>N, DIPEA, 99.5%, Acros Organics), (4-methoxyphenyl)boronic acid (C<sub>7</sub>H<sub>9</sub>BO<sub>3</sub>, 98%, TCI), 4-fluorophenylboronic acid (C<sub>6</sub>H<sub>6</sub>BFO<sub>2</sub>, 98%, Alfa Aesar), and 4-chlorophenylboronic acid (C<sub>6</sub>H<sub>6</sub>BClO<sub>2</sub>, 98%, Nova-Matls) were used as received. Milli-Q water (18.2 mΩ) was used to prepare all solutions.

### **Synthesis of Cu<sub>2</sub>O crystals**

All Cu<sub>2</sub>O crystals were synthesized in a 31 °C water bath. For the growth of Cu<sub>2</sub>O cubes, 114.6 mL of deionized water was added to a beaker containing 1.044 g of SDS. Next, 1.2 mL of 0.1 M CuCl<sub>2</sub> solution was added to the beaker and kept stirring for 25 min. After that, 2.4 mL of 1.0 M NaOH solution was introduced and stirred for 5 sec. Finally, 1.8 mL of 0.2 M NH<sub>2</sub>OH·HCl solution was quickly added and stirred for 10 sec. After stop stirring, the solution was aged for 50 min.

To synthesize Cu<sub>2</sub>O octahedra, 26.26 mL of deionized water was added to a sample vial containing 0.348 g of SDS. 0.8 mL of 0.1 M CuCl<sub>2</sub> solution was added into the vial and kept stirring for 25 min. After that, 0.8 mL of 1.0 M NaOH solution was introduced and stirred for 3 sec. Finally, 2.6 mL of 0.2 M NH<sub>2</sub>OH·HCl solution

was quickly added and stirred for 10 sec. The solution was aged for 25 min.

To make Cu<sub>2</sub>O rhombic dodecahedra, 27.68 mL of deionized water was added to a sample vial containing 0.348 g of SDS. Then 2 mL of 0.1 M CuCl<sub>2</sub> solution was added into the vial and kept stirring for 25 min. After that, 0.72 mL of 1.0 M NaOH solution was added and stirred for 5 sec. Finally, 9.6 mL of 0.1 M NH<sub>2</sub>OH·HCl solution was quickly added and stirred for 20 sec. The solution was aged for 50 min.

The solid product was centrifuged at 7500 rpm for 3 min, and washed with 1:1 volume ratio of water and ethanol for 3 times to remove residual chemicals and SDS, and then washed with 95% ethanol once. After washing, the particles were stored in absolute ethanol to avoid oxidation.

### **Electron paramagnetic resonance measurements**

Commercially available 5,5-dimethyl-1-pyrroline-N-oxide (DMPO) would cause high EPR background from impurities. Thus, DMPO needs to be purified before EPR measurements. First, a 1.0 M DMPO solution was prepared by adding 0.2264 g of DMPO to 2 mL of 0.1 M phosphate buffer solution to give a solution pH of 7.4. Then 2 mL of 1.0 M DMPO solution was repeatedly sonicated with activated charcoal and centrifuged for 3 times. A syringe filter was used to remove residual activated charcoal.

After DMPO purification, each shape of pristine and 4-TFMA-modified Cu<sub>2</sub>O particles were dispersed in phosphate buffer solution with a concentration of 1 mg/mL, and 0.1, 0.2 and 0.5 mL of cube, rhombic dodecahedron, and octahedron solutions were added to vials, respectively. Then 0.1 mL of 1.0 M DMPO solution was added to the vials and filled up to 1 mL with phosphate buffer solution. The solutions were placed 30 cm from a xenon lamp with a long-pass Y-43 cutoff filter between the xenon lamp and vial, irradiated with stirring for 2 min, and sent for EPR measurements immediately. The settings of EPR instrument are: center field 3497.7 G, sweep width 100 G, sampling time 20 ms, microwave frequency 9.82 GHz, microwave power 15 mW, receiver gain 30, and receiver time constant 327.7 ms.

**Table S1** Calculations of weights of 4-TFMA and  $K_2CO_3$  needed for  $Cu_2O$  molecular functionalization

|                                              | <b>RD</b>              | <b>Octahedra</b>       | <b>Cubes</b>           |
|----------------------------------------------|------------------------|------------------------|------------------------|
| size (nm)                                    | <b>295</b>             | <b>311</b>             | <b>318</b>             |
| density of $Cu_2O$ ( $mg/nm^3$ )             | $6.03 \times 10^{-18}$ |                        |                        |
| volume of one particle ( $nm^3$ )            | $1.82 \times 10^7$     | $5.02 \times 10^6$     | $3.22 \times 10^7$     |
| weight of one particle (mg)                  | $1.10 \times 10^{-10}$ | $3.03 \times 10^{-11}$ | $1.94 \times 10^{-10}$ |
| total weight of $Cu_2O$ (mg)                 | <b>10</b>              |                        |                        |
| number of particles                          | $9.09 \times 10^{10}$  | $3.30 \times 10^{11}$  | $5.15 \times 10^{10}$  |
| total surface area ( $nm^2$ )                | $3.37 \times 10^{16}$  | $5.53 \times 10^{16}$  | $3.12 \times 10^{16}$  |
| surface Cu atom density ( $nm^{-1}$ )        | 7.76                   | 14.27                  | 10.98                  |
| number of surface Cu atoms                   | $2.62 \times 10^{17}$  | $7.89 \times 10^{17}$  | $3.43 \times 10^{17}$  |
| weight of 4-TFMA (mg)<br>(Cu:4-TFMA = 1:100) | <b>7.4</b>             | <b>22.3</b>            | <b>9.7</b>             |
| weight of $K_2CO_3$ (mg)                     | <b>6.0</b>             | <b>18.1</b>            | <b>7.9</b>             |

**Table S2** Calculations of particle weights needed for photodegradation experiment with the same total particle surface area of  $0.03 m^2$

|                                         | <b>RD</b>             | <b>Octahedra</b>      | <b>Cubes</b>          |
|-----------------------------------------|-----------------------|-----------------------|-----------------------|
| length (nm)                             | <b>295</b>            | <b>311</b>            | <b>318</b>            |
| surface area of one particle ( $nm^2$ ) | $3.70 \times 10^5$    | $1.67 \times 10^5$    | $6.06 \times 10^5$    |
| fixed surface area ( $m^2$ )            | <b>0.03</b>           |                       |                       |
| number of particles                     | $9.10 \times 10^{10}$ | $3.32 \times 10^{11}$ | $5.18 \times 10^{10}$ |
| weight (mg)                             | <b>8.9</b>            | <b>5.4</b>            | <b>9.5</b>            |

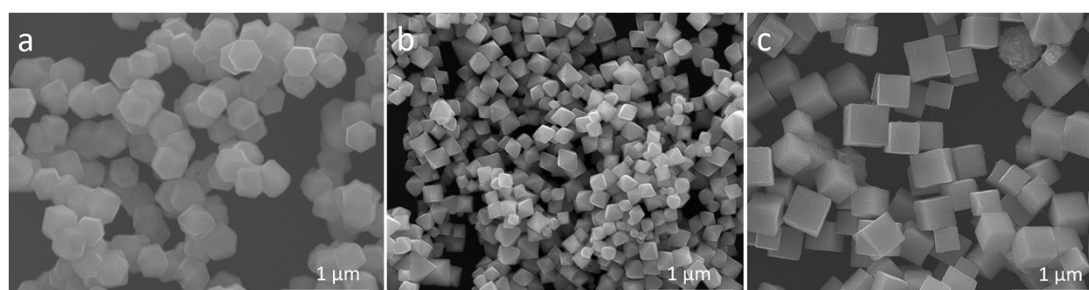

**Fig. S1** SEM images of the synthesized  $Cu_2O$  (a) rhombic dodecahedra, (b) octahedra and (c) cubes.

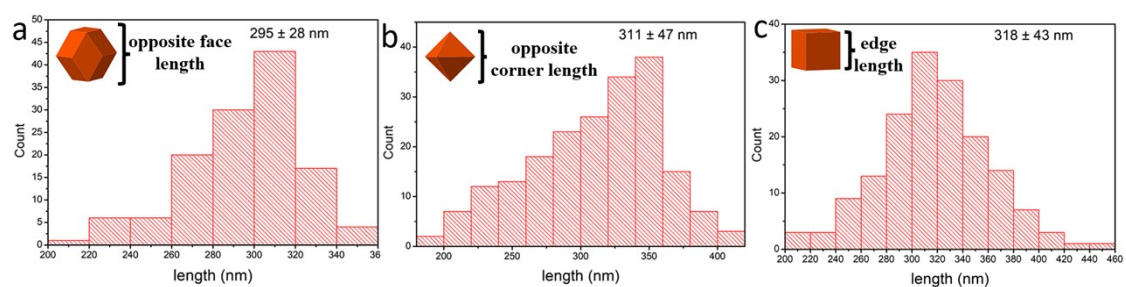

**Fig. S2** Size distribution histograms of the synthesized Cu<sub>2</sub>O (a) rhombic dodecahedra, (b) octahedra and (c) cubes.

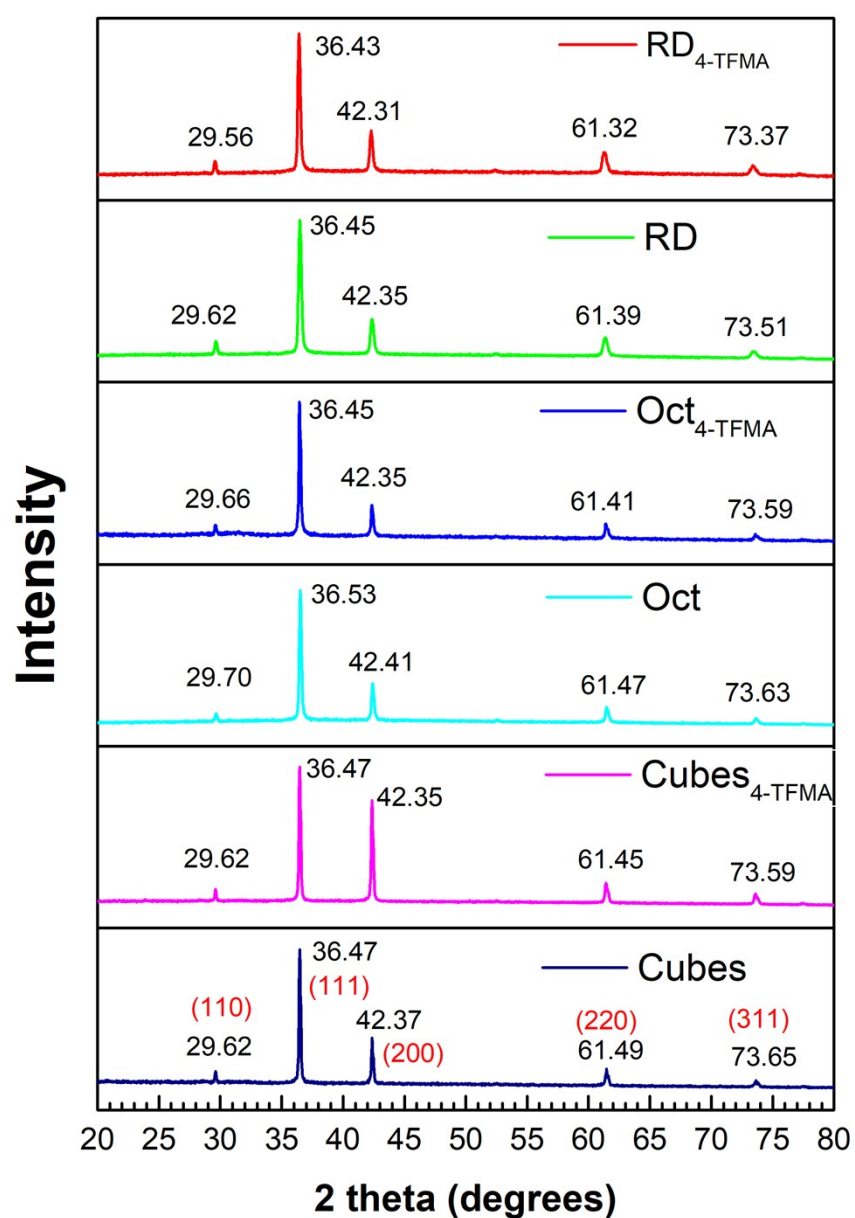

**Fig. S3** XRD patterns of different pristine and 4-TFMA-modified Cu<sub>2</sub>O crystals.

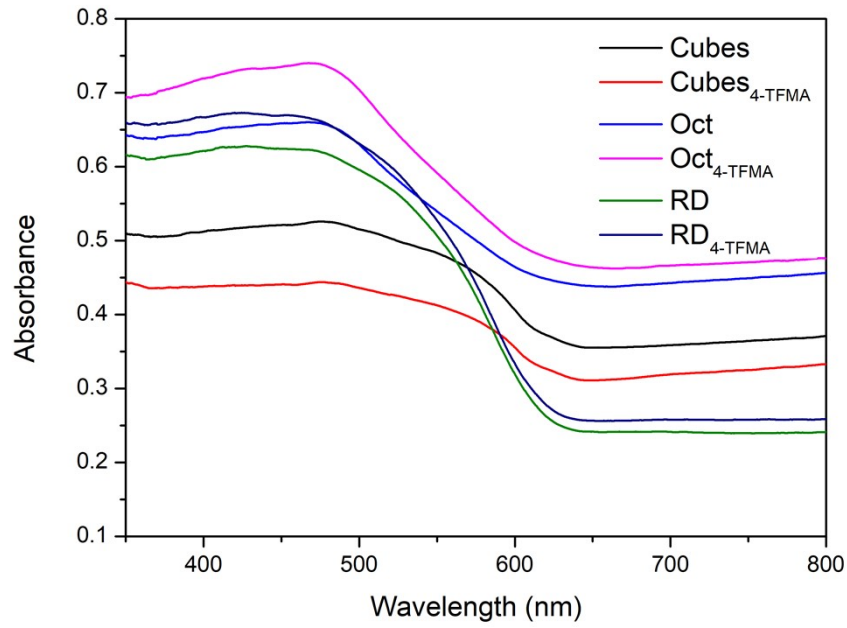

**Fig. S4** Diffuse reflectance spectra of different  $\text{Cu}_2\text{O}$  crystals with and without 4-TFMA modification.

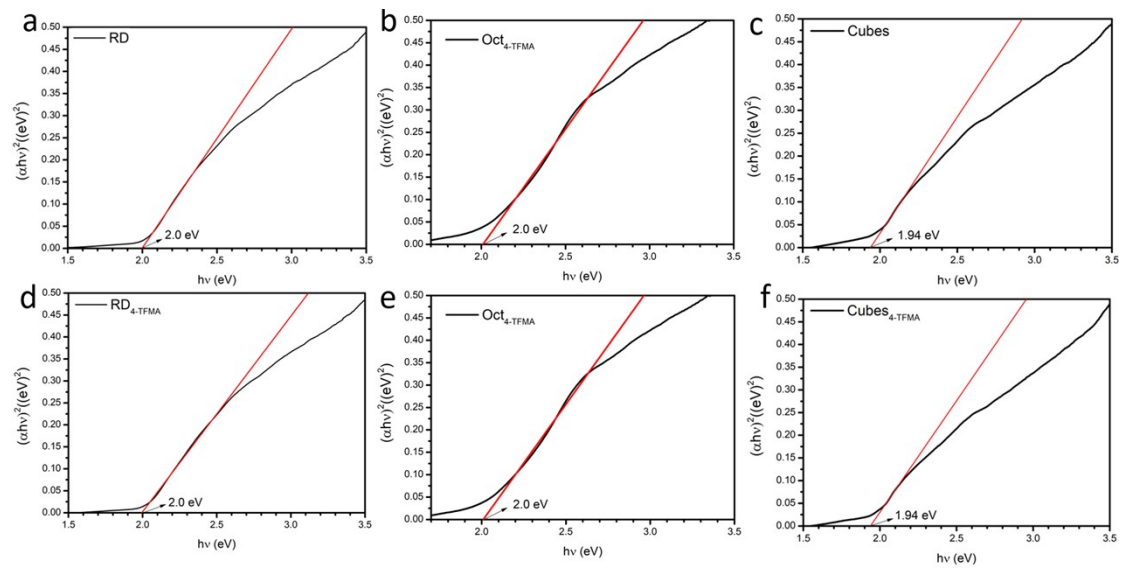

**Fig. S5 (a–f)** Tauc plots of pristine and 4-TFMA-functionalized  $\text{Cu}_2\text{O}$  crystals for band gap energy determination.

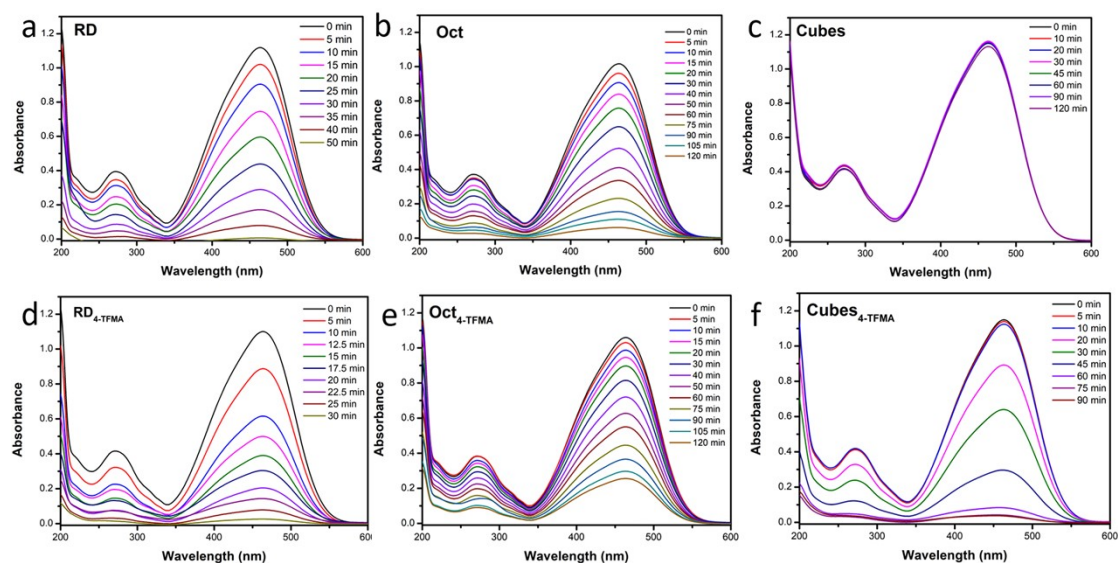

**Fig. S6** (a–c) Time-dependent UV–vis absorption spectra of methyl orange photodegraded by  $\text{Cu}_2\text{O}$  rhombic dodecahedra, octahedra and cubes. (d–f) Time-dependent UV–vis absorption spectra of methyl orange photodegraded by 4-TFMA-modified  $\text{Cu}_2\text{O}$  rhombic dodecahedra, octahedra and cubes.

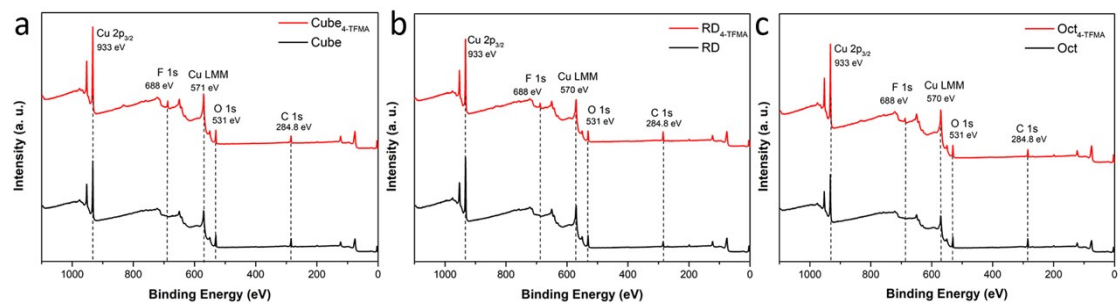

**Fig. S7** XPS spectra of pristine and 4-TFMA-modified  $\text{Cu}_2\text{O}$  (a) cubes, (b) rhombic dodecahedra and (c) octahedra.

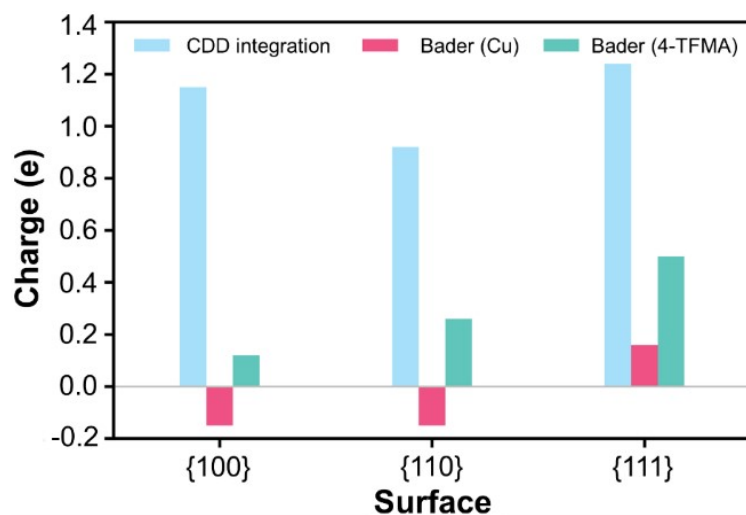

**Fig. S8** The integral values of charge density difference and Bader charge difference (for surface Cu atoms and 4-TFMA molecule) of 4-TFMA-decorated Cu<sub>2</sub>O {100}, {110} and {111} surfaces.

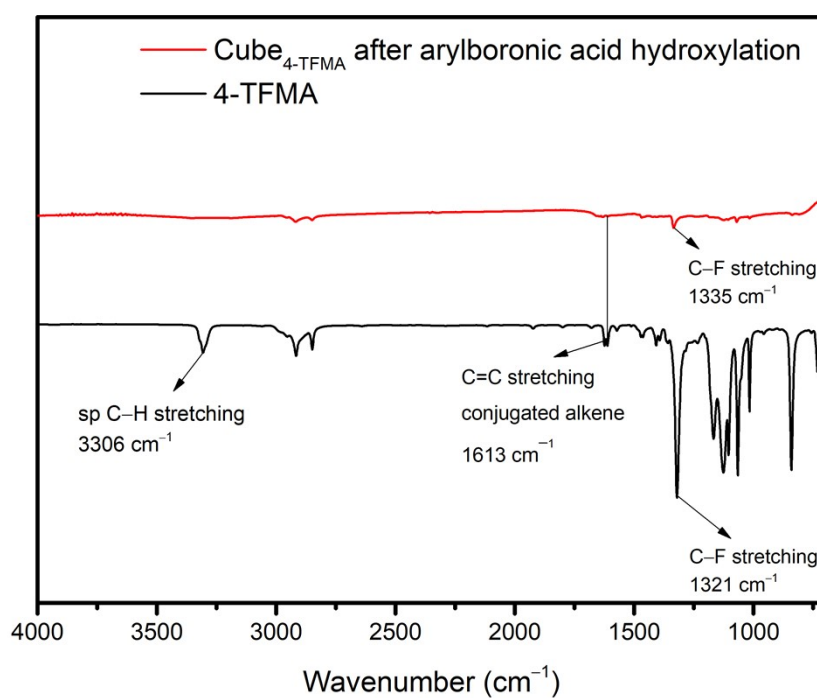

**Fig. S9** FT-IR spectra of 4-TFMA and the functionalized Cu<sub>2</sub>O cubes after the arylboronic acid hydroxylation reaction.

## Cubes

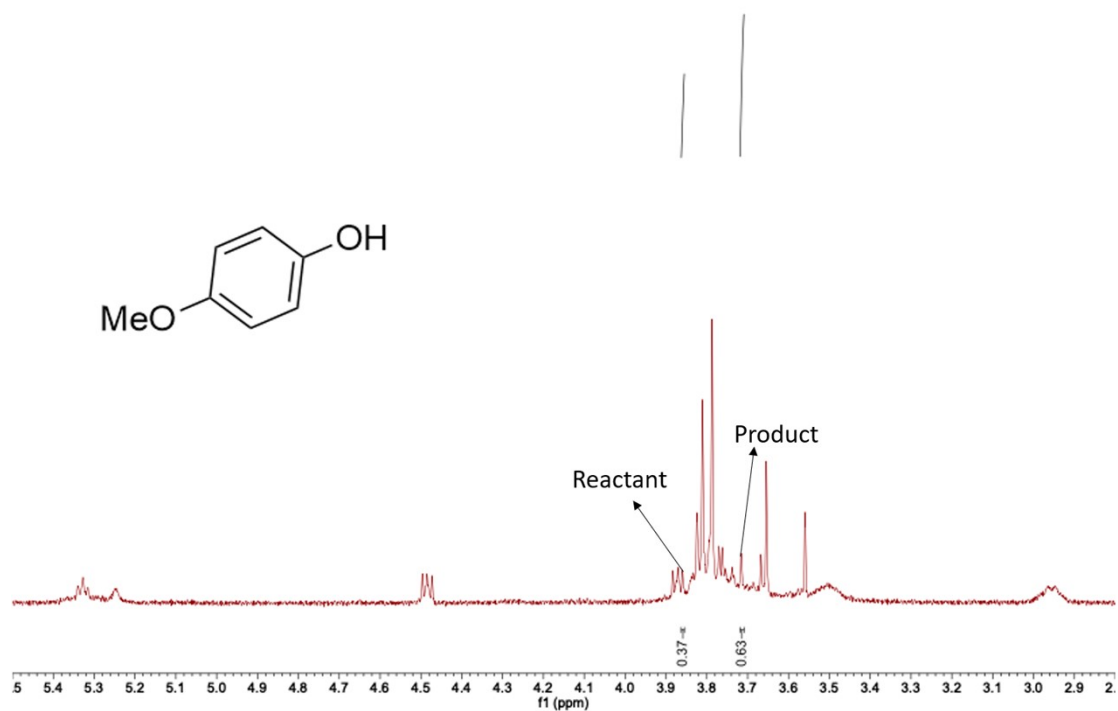

**Spectrum S1** <sup>1</sup>H NMR spectrum of 4-methoxyphenylboronic acid conversion to 4-methoxyphenol using Cu<sub>2</sub>O cubes as the photocatalyst.

## Cubes<sub>4</sub>-TFMA

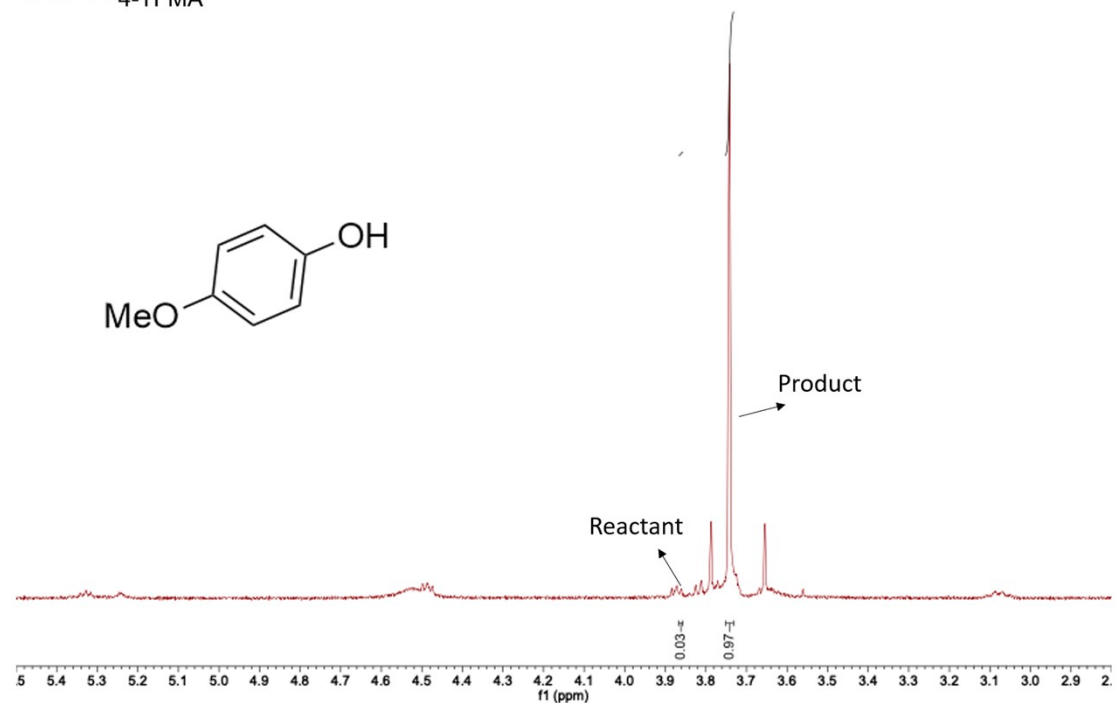

**Spectrum S2** <sup>1</sup>H NMR spectrum of 4-methoxyphenylboronic acid conversion to 4-methoxyphenol using 4-TFMA-modified Cu<sub>2</sub>O cubes as the photocatalyst.



## Cubes

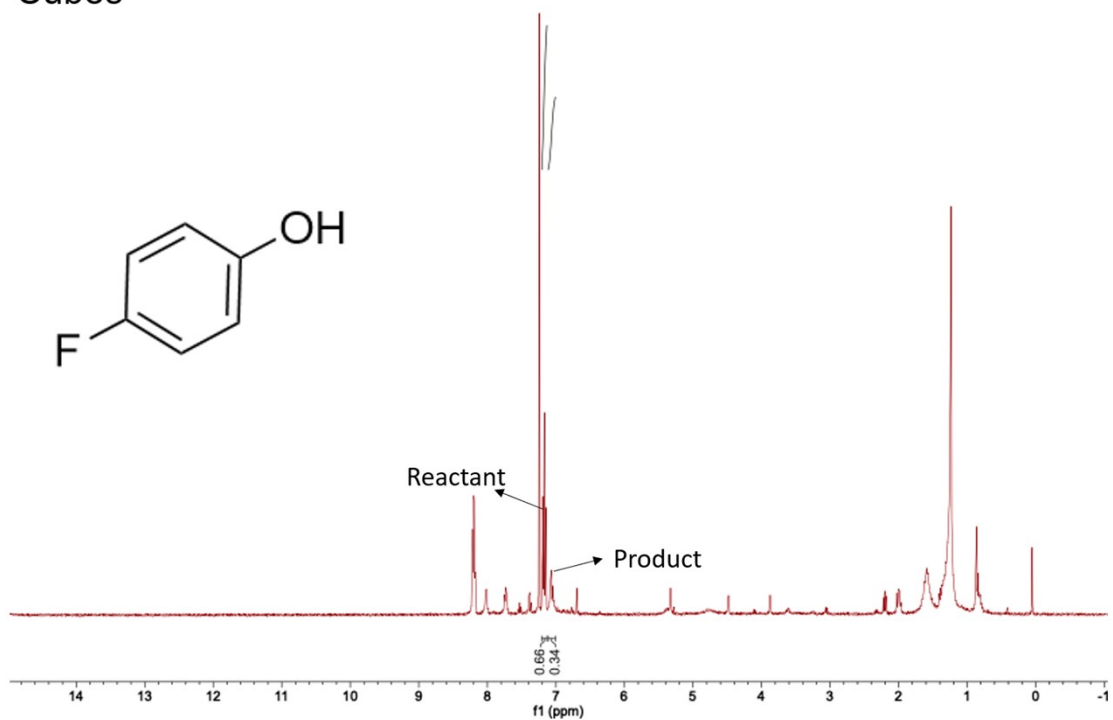

**Spectrum S3** <sup>1</sup>H NMR spectrum of 4-fluorophenylboronic acid conversion to 4-methoxyphenol using Cu<sub>2</sub>O cubes as the photocatalyst.

## Cubes<sub>4</sub>-TFMA

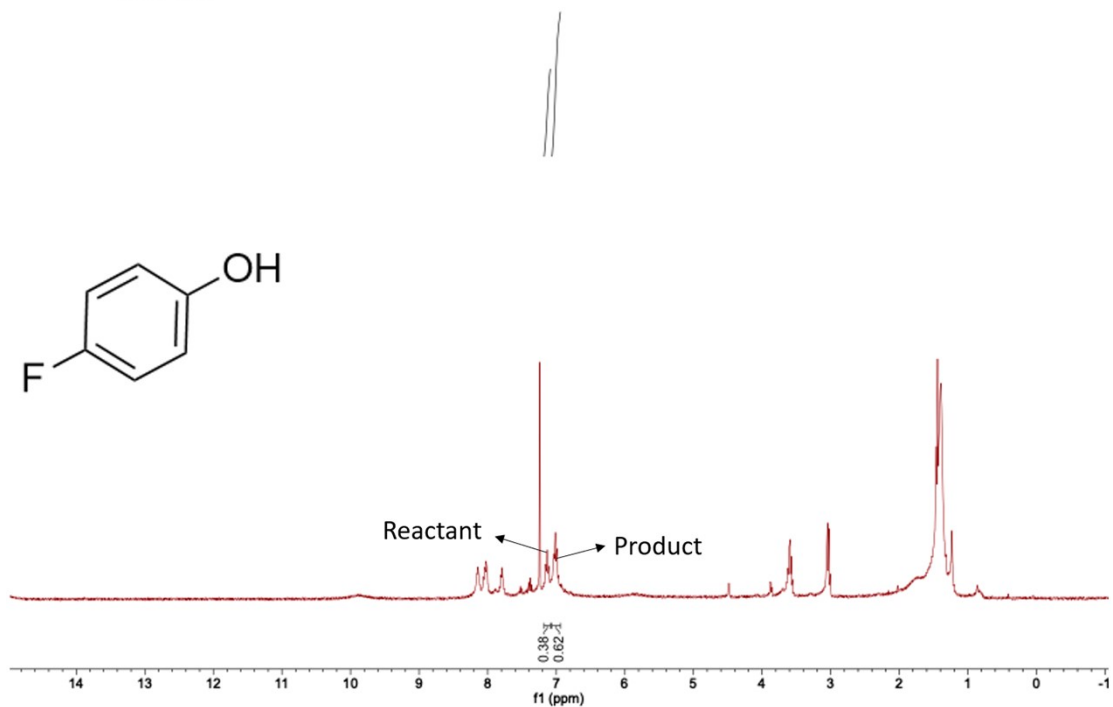

**Spectrum S4** <sup>1</sup>H NMR spectrum of 4-fluorophenylboronic acid conversion to 4-fluorophenol using 4-TFMA-modified Cu<sub>2</sub>O cubes as the photocatalyst.

## Cubes

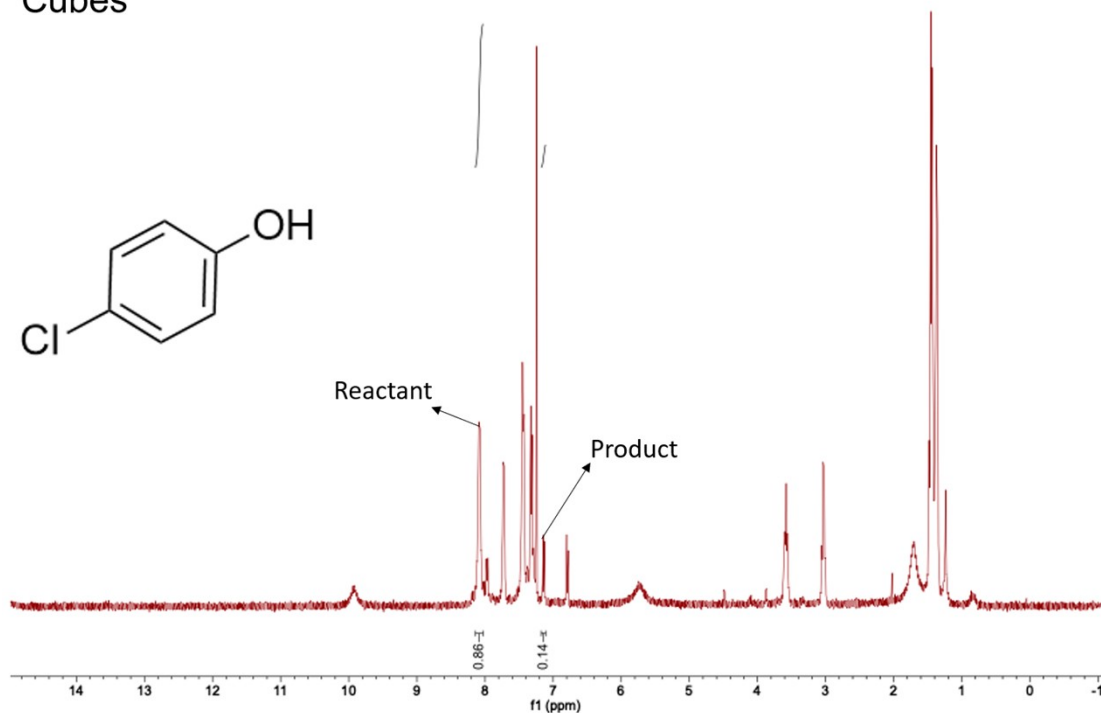

**Spectrum S5** <sup>1</sup>H NMR spectrum of 4-chlorophenylboronic acid conversion to 4-chlorophenol using Cu<sub>2</sub>O cubes as the photocatalyst.

## Cubes<sub>4-TFMA</sub>

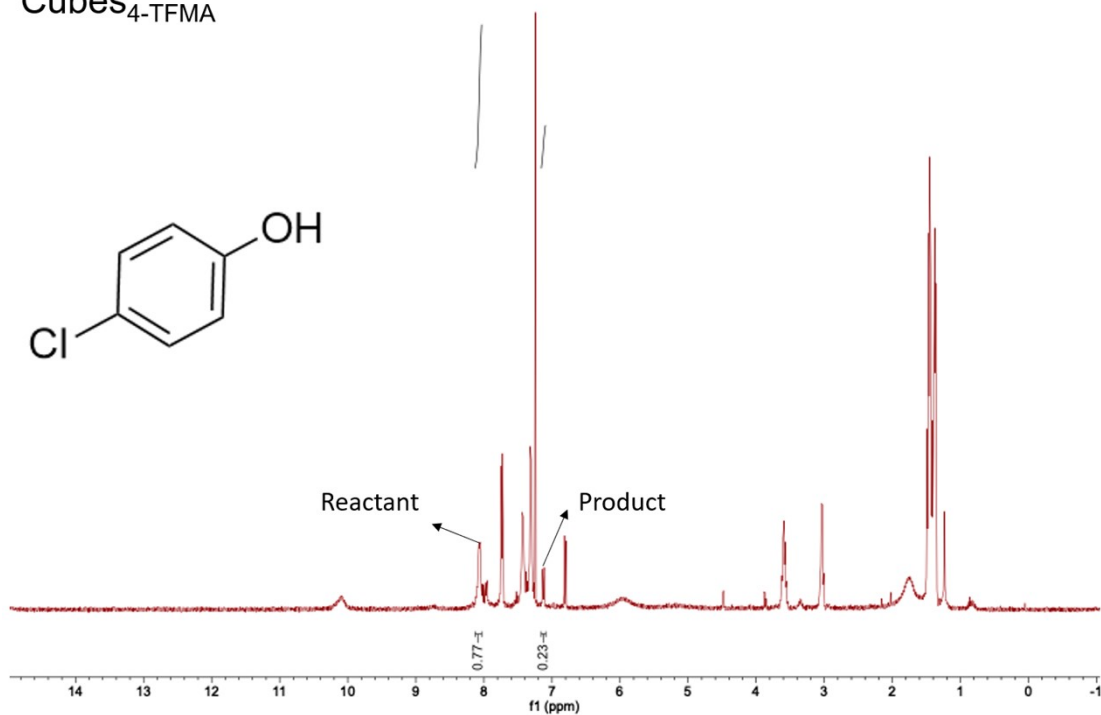

**Spectrum S6** <sup>1</sup>H NMR spectrum of 4-chlorophenylboronic acid conversion to 4-chlorophenol using 4-TFMA-modified Cu<sub>2</sub>O cubes as the photocatalyst.
